# Supplementary figures and images for: Double symmetry breaking in filamentous colloidal tactoids
Source: Royal Society of Chemistry journal article supplement (doi:10.1039/d5sm00236b), 2025-01-01

Flow field  $\vec{u}(\mathbf{h}, \rho) \longrightarrow$

**a**

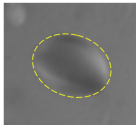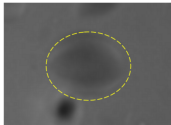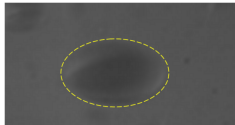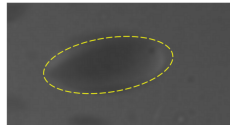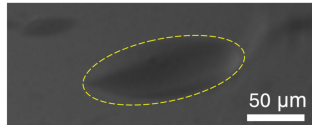

**b**

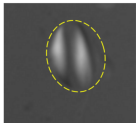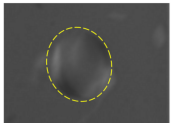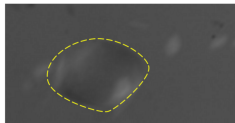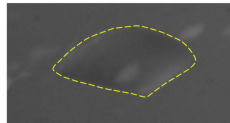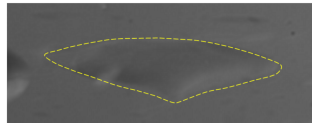

Supplement: d5sm00236b1.pdf [file d5sm00236b1.pdf]

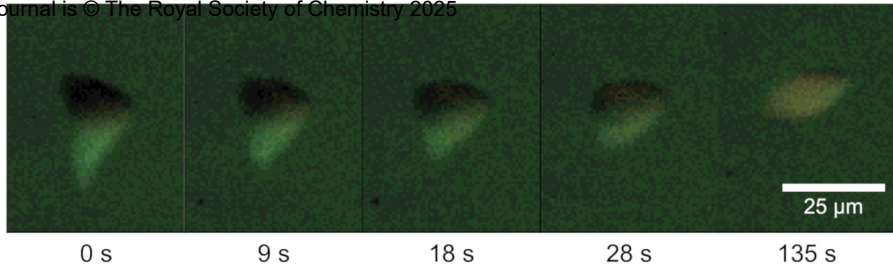

Supplement: d5sm00236b2.pdf [file d5sm00236b2.pdf]
